# Supplementary material for: Modeling the hydrological benefits of green roof systems: applications and future needs
Source: Royal Society of Chemistry journal article supplement (doi:10.1039/d3ew00149k), 2023-01-01
Supplement: d3ew00149k1.pdf [file d3ew00149k1.pdf]

## **Modeling the Hydrological Benefits of Green Roof Systems: Applications and Future Needs**

Zhaokai Dong,<sup>a</sup> Daniel J. Bain,<sup>b</sup> Kimberly A. Gray,<sup>c</sup> Murat Akcakaya<sup>d</sup> and Carla Ng<sup>\*a</sup>

<sup>a</sup> Department of Civil and Environmental Engineering, University of Pittsburgh, Pittsburgh, PA 15261 USA.

<sup>b</sup> Department of Geology and Environmental Science, University of Pittsburgh, Pittsburgh, PA 15261 USA.

<sup>c</sup> Department of Civil and Environmental Engineering, Northwestern University, Evanston, IL 60208 USA.

<sup>d</sup> Department of Electrical and Computer Engineering, University of Pittsburgh, Pittsburgh, PA 15261 USA.

\* Corresponding author email: [carla.ng@pitt.edu](mailto:carla.ng@pitt.edu)

## Supporting information

Table S1 General comparison of the main characteristics of GR models (Y: required to specify; N: not required; D: depends on simulations; E: enables; conceptual models are marked in bold and mechanistic models are marked in italics)

| Model type                | Number of studies | Initial condition | Boundary condition | Grid mesh | Soil characteristic parameterization | Water content simulation | Computational demand |
|---------------------------|-------------------|-------------------|--------------------|-----------|--------------------------------------|--------------------------|----------------------|
| <b>SCS curve number</b>   | 6                 | N                 | N                  | N         | N                                    | N                        | Low                  |
| <i>Green-Ampt</i>         | 1                 | Y                 | N                  | N         | Y                                    | E                        | Moderate             |
| Machine learning          | 1                 | Y                 | N                  | N         | N                                    | E                        | High                 |
| <i>SWMS 2D</i>            | 2                 | Y                 | Y                  | Y         | Y                                    | E                        | High                 |
| <i>Richard's equation</i> | 4                 | Y                 | Y                  | Y         | Y                                    | E                        | High                 |
| <b>Water balance</b>      | 21                | Y                 | N                  | N         | Y                                    | E                        | Low                  |
| <b>Reservoir</b>          | 10                | Y                 | N                  | N         | Y                                    | E                        | Low                  |
| <i>Hydrus-1D</i>          | 14                | Y                 | Y                  | Y         | Y                                    | E                        | High                 |
| <i>SWMM</i>               | 22                | Y                 | N                  | N         | Y                                    | E                        | Moderate             |
| Other models              | 11                | Y                 | D                  | D         | D                                    | D                        | D                    |

Table S2 Summary of the reviewed GR literature

| <b>Title</b>                                                                                                                                                  | <b>Summary</b>                                                                                                                                                                   | <b>Model</b> | <b>Scale (cm)</b>                                                    | <b>Substrate composition</b>                                                             | <b>Performance</b>        | <b>Year</b> |
|---------------------------------------------------------------------------------------------------------------------------------------------------------------|----------------------------------------------------------------------------------------------------------------------------------------------------------------------------------|--------------|----------------------------------------------------------------------|------------------------------------------------------------------------------------------|---------------------------|-------------|
| Observed and Modeled Performances of Prototype Green Roof Test Plots Subjected to Simulated Low- and High-Intensity Precipitations in a Laboratory Experiment | GR hydrological performance was related to the substrate depth. The curve number method underpredicted roof discharge compared to the storage node approach in SWMM simulations. | SWMM         | Lab-scale;<br>122 x 61<br>(2.5, 6.3, 10.1 cm);<br>2% slope           |                                                                                          | Standard error            | 2010        |
| Modelling of green roofs' hydrologic performance using EPA's SWMM                                                                                             | The authors found specifying the initial soil moisture content was very important to achieve a successful simulation.                                                            | SWMM         | Lab-scale;<br>240 x 120 (35 cm);<br>7.7% slope                       |                                                                                          | NSE                       | 2013        |
| Assessment of the hydrological impacts of green roof: From building scale to basin scale                                                                      | GR hydrological benefits were more pronounced at the roof scale than at the basin scale.                                                                                         | SWMM         | Full-scale and basin scale;<br>7 x 5 m<br>(3 or 15 cm);<br>Flat roof | Lapillus, peat and green compost (organic part represents 3.4% in mass of the substrate) | NSE                       | 2015        |
| A long-term hydrological modelling of an extensive green roof by means of SWMM                                                                                | The hydrological performance of GR was influenced by the definition of rainfall events, green roof scale, and initial soil moisture content.                                     | SWMM         | Lab-scale;<br>5.15 m x 11.30 m<br>(10 cm);<br>slope of 0.5%          |                                                                                          | NSE                       | 2016        |
| Simulation of green roof test bed runoff                                                                                                                      | SWMM GR module was capable of simulating GR hydrological performance but was more accurate for high-intensity                                                                    | SWMM         | Lab-scale;<br>1 x 2 m<br>10cm;                                       | Crushed brick (85%), compost (5%), peat (5%)                                             | Volume error (VE);<br>NSE | 2016        |

|                                                                                                                                       |                                                                                                         |                              |                                                                                  |                                                            |     |      |
|---------------------------------------------------------------------------------------------------------------------------------------|---------------------------------------------------------------------------------------------------------|------------------------------|----------------------------------------------------------------------------------|------------------------------------------------------------|-----|------|
|                                                                                                                                       | rainfall events. ET had significant influence on continuous simulations.                                |                              | Slope of 8%                                                                      | and crushed bark (5%)                                      |     |      |
| Green roof benefits for reducing flood risk at the catchment scale                                                                    | Initial soil water content influenced GR modeling results.                                              | SWMM                         | Basin-scale;<br>Design purpose of area of 100 m <sup>2</sup>                     |                                                            |     | 2016 |
| Assessing methods for predicting green roof rainfall capture: A comparison between full-scale observations and four hydrologic models | The CN and GRE method were more accurate to replicate observed flow. SWMM tended to overpredict runoff. | SWMM;<br>CN;<br>HELP;<br>CRE | Full-scale;<br>310 m <sup>2</sup> and 390 m <sup>2</sup> ;<br>(32 mm and 100 mm) |                                                            | NSE | 2015 |
| Independent Validation of the SWMM Green Roof Module                                                                                  | SWMM module did not consider ET reduction due to reduced soil moisture.                                 | SWMM                         | Lab-scale;<br>3m × 1m<br>(8 cm);<br>slope of 2.6%                                | Crushed brick and fines                                    | NSE | 2017 |
| Monitoring and Modeling the Long-Term Rainfall-Runoff Response of the Jacob K. Javits Center Green Roof                               | The depth of the substrate had high impacts on water retention.                                         | SWMM                         | Full-scale;<br>186 m <sup>2</sup> ;<br>(2.54 cm)                                 | Composted plant materials and lightweight porous aggregate |     | 2018 |
| Sensitivity of Model-Based Water Balance to Low Impact Development Parameters                                                         | Soil thickness, porosity, conductivity slope, and field capacity impacted GR runoff volume.             | SWMM                         |                                                                                  |                                                            |     | 2018 |
| Assessing the significance of evapotranspiration in green roof modeling by SWMM                                                       | Model performance can be improved with consideration of ET.                                             | SWMM                         |                                                                                  |                                                            | NSE | 2018 |
| Assessing the Hydrologic Performance of a Green                                                                                       | SWMM may underestimate runoff due to an overestimate of actual ET.                                      | SWMM                         | Basin-scale                                                                      |                                                            | -   | 2018 |

|                                                                                                            |                                                                                                                                                            |                      |                                                                                           |  |                               |      |
|------------------------------------------------------------------------------------------------------------|------------------------------------------------------------------------------------------------------------------------------------------------------------|----------------------|-------------------------------------------------------------------------------------------|--|-------------------------------|------|
| Roof Retrofitting Scenario for a Small Urban Catchment                                                     |                                                                                                                                                            |                      |                                                                                           |  |                               |      |
| Hydrological modelling of green and grey roofs in cold climate with the SWMM model                         | SWMM model can predict GR runoff but was less performed in winter seasons. Model parameters may be site-specific and inconsistent with recommended values. | SWMM                 | Full-scale;<br>8 × 11 m<br>(20 cm);<br>slope of 2%                                        |  | NSE;<br>VE                    | 2019 |
| The transferability of SWMM model parameters between green roofs with similar build-up                     | Parameter transferability was poor even with same roof configurations. Parameters were more site and climate specific.                                     | SWMM                 | Pilot-scale and Full-scale:<br>8 – 100 m <sup>2</sup><br>(3 – 10 cm)<br>Slope of 2% – 27% |  | NSE;<br>VE                    | 2019 |
| Assessment of a green roof practice using the coupled SWMM and HYDRUS models                               | SWMM predictions were sensitive to field capacity and porosity. SWMM could be less accurate in soil moisture predictions than Hydrus-1D.                   | SWMM;<br>Hydrus-1D   | Pilot-scale;<br>4 × 4 m<br>(20 cm)                                                        |  | RMSE;<br>MAE;<br>NSE          | 2020 |
| Modelling runoff reduction through implementation of green and grey roofs in urban catchments using PCSWMM | Implementation of GR on 11% of the roof area can substantially reduce maximum flows.                                                                       | SWMM                 |                                                                                           |  | NSE;<br>VE;<br>R <sup>2</sup> | 2020 |
| Comparing simulations of green roof hydrological processes by SWMM and HYDRUS-1D                           | SWMM predictions were sensitive to the roughness of drainage mat and may overpredict peak flow rates compared to Hydrus-1D.                                | SWMM;<br>Hydrus-1D   | Pilot-scale;<br>0.5 x 0.5 m<br>(13.5cm);<br>Slope of 0%                                   |  | NSE                           | 2020 |
| Impact of rainfall properties on the performance of                                                        | GR model performance was impacted by rainfall event characteristics.                                                                                       | SWMM;<br>Nash model; | Pilot-scale;<br>1 x 2.5m<br>(15cm);                                                       |  | NSE;<br>RMSE;<br>MSE          | 2020 |

|                                                                                                                        |                                                                                                                                                     |                                           |                                                                                                                    |                                                            |            |      |
|------------------------------------------------------------------------------------------------------------------------|-----------------------------------------------------------------------------------------------------------------------------------------------------|-------------------------------------------|--------------------------------------------------------------------------------------------------------------------|------------------------------------------------------------|------------|------|
| hydrological models for green roofs simulation                                                                         |                                                                                                                                                     | Hydrus-1D                                 | slope of 1%                                                                                                        |                                                            |            |      |
| A continuous simulation approach to quantify the climate condition effect on the hydrologic performance of green roofs | The study highlighted the importance of ET to GR continuous simulations. Reduction in runoff and peak flow was related to rainfall characteristics. | SWMM                                      | Basin-scale                                                                                                        |                                                            |            | 2019 |
| Performance comparison of green roof hydrological models for full-scale field sites                                    | Model performance was related to the event characteristics.                                                                                         | SWMM;<br>Hydrus-1D;<br>Mike SHE;<br>Urbis | Full-scale;<br>280 m <sup>2</sup><br>(Vary from 4 and 14 cm);<br>2469 m <sup>2</sup> ;<br>(Vary from 4.2 and 8 cm) |                                                            | NSE;<br>VE | 2021 |
| Robust Vegetation Parameterization for Green Roofs in the EPA Stormwater Management Model (SWMM)                       | ET estimation based on Penman–Monteith equation outperformed the Hargreaves equation.                                                               | SWMM                                      | Pilot-scale;<br>2 × 2 m<br>(3.3 cm);<br>Slope of 2%                                                                |                                                            |            | 2021 |
| Insights into green roof modeling using SWMM LID controls for detention-based designs                                  | Model performance was affected by the parametrization of drainage mat.                                                                              | SWMM                                      | Pilot-scale;<br>7.43 m <sup>2</sup><br>(5 cm);<br>Slopes of 0% and 2% respectively                                 |                                                            | NSE        | 2022 |
| Moisture content behaviour in extensive green roofs during dry periods: The influence of vegetation and substrate      | ET was influenced by soil water availability and climate conditions. Commonly used ET models tended to overestimate ET.                             | Water balance                             | Pilot-scale;<br>3 x 1m<br>(8 cm);<br>Slope of 2.6%                                                                 | 1. Crushed bricks and pumice (ZincolitPlus), enriched with |            | 2014 |

|                                                                                                                          |                                                                                                                                              |                                               |                                                                 |                                                                             |  |      |
|--------------------------------------------------------------------------------------------------------------------------|----------------------------------------------------------------------------------------------------------------------------------------------|-----------------------------------------------|-----------------------------------------------------------------|-----------------------------------------------------------------------------|--|------|
| characteristics                                                                                                          |                                                                                                                                              |                                               |                                                                 | organic matter;<br>2. 80% LECA,<br>10% loam and<br>10% compost by<br>volume |  |      |
| Parameterizing a Water-Balance Model for Predicting Stormwater Runoff from Green Roofs                                   | Crop coefficients varied across different vegetation species and seasons. Using adjusted ET, a water balance-based model can predict runoff. | Water balance                                 | Pilot-scale;<br>1.31 m <sup>2</sup>                             |                                                                             |  | 2016 |
| Internal fluctuations in green roof substrate moisture content during storm events: Monitored data and model simulations | Richard equation solutions were sensitive to the lower boundary condition and hydraulic conductivity function.                               | Lumped reservoir model;<br>Richard's equation | Pilot-scale;<br>3 m × 1 m<br>(8 cm);<br>slope of 1.5°;<br>sedum |                                                                             |  | 2019 |
| Modeling stormwater runoff from green roofs with HYDRUS-1D                                                               | Hydrus-1D could overestimate GR runoff.                                                                                                      | Hydrus-1D                                     | Pilot-scale;<br>60 x 60 cm<br>(10cm);<br>Slope of 0             |                                                                             |  | 2008 |
| Compared performance of a conceptual and a mechanistic hydrologic models of a green roof                                 | Hydrus-1D showed high accuracy in runoff predictions.                                                                                        | Hydrus-1D;<br>Lumped reservoir model          | Full-scale;<br>350 m <sup>2</sup><br>(20 cm)                    |                                                                             |  | 2012 |
| Saturation-excess and infiltration-excess runoff on green roofs                                                          | GR runoff primarily come from substrate saturation rather than the rainfall intensity exceeding infiltration capacity.                       | Hydrus-1D                                     | Full-scale;<br>120 m <sup>2</sup><br>(15 cm);<br>Slope of 3°    |                                                                             |  | 2015 |

|                                                                                                                                                                  |                                                                                                                                                                                                                                                                   |                                |                                                         |                                                                                                  |  |      |
|------------------------------------------------------------------------------------------------------------------------------------------------------------------|-------------------------------------------------------------------------------------------------------------------------------------------------------------------------------------------------------------------------------------------------------------------|--------------------------------|---------------------------------------------------------|--------------------------------------------------------------------------------------------------|--|------|
| Modelling green roof stormwater response for different soil depths                                                                                               | GR peak flow reduction was positively correlated to the soil depth and negatively correlated to the initial soil moisture content.                                                                                                                                | Hydrus-1D                      |                                                         |                                                                                                  |  | 2016 |
| Simulation of green roof runoff under different substrate depths and vegetation covers by coupling a simple conceptual and a physically based hydrological model | The conceptual model performed better than Hydrus-1D in outflow predictions.                                                                                                                                                                                      | Hydrus-1D;<br>Reservoir models | Pilot-scale;<br>200 x 100 cm (8/16 cm)                  | Pumice, attapulgite clay, zeolite and grape marc compost at volumetric proportions of 65:15:5:15 |  | 2017 |
| Hydrological Performance and Runoff Water Quality of Experimental Green Roofs                                                                                    | Hydrus-1D could overestimate the runoff. Total nitrogen in GR runoff was higher than in the rainwater.                                                                                                                                                            | Hydrus-1D                      | Pilot-scale;<br>200 x 100 cm (12 cm);<br>Slope of 3°    |                                                                                                  |  | 2018 |
| Experimental study on the hydrological performance of green roofs in the application of novel biochar                                                            | Vegetated soil had higher saturated hydraulic conductivity than bare soil. Biochar increased GR retention capacity.                                                                                                                                               | Hydrus-1D                      | Pilot-scale;<br>Cylinder with diameter of 25 cm (15 cm) | Grinded and sieved through 2 mm                                                                  |  | 2020 |
| Experimental and numerical investigation on hydrological characteristics of extensive green roofs under the influence of rainstorms                              | Under the condition of surface ponding, GR water retention was impacted by the cumulative rainfall and the available water storage within GR. Adding a bottom water storage layer increased retention capacity and had larger effects than increasing soil depth. | Hydrus-1D                      | Pilot-scale;<br>30 x 30 cm (10 cm)                      |                                                                                                  |  | 2022 |
| A Mass Balance Model for Designing Green                                                                                                                         | A mass balance model was introduced to support design of irrigated GR systems                                                                                                                                                                                     | Water balance                  |                                                         |                                                                                                  |  | 2012 |



|                                                                                                                          |                                                                                                                         |                                       |                                                                                       |                                                                                                            |                |      |
|--------------------------------------------------------------------------------------------------------------------------|-------------------------------------------------------------------------------------------------------------------------|---------------------------------------|---------------------------------------------------------------------------------------|------------------------------------------------------------------------------------------------------------|----------------|------|
| Roof Systems that Incorporate a Cistern for Re-Use                                                                       | using cisterns to capture and reuse rain waters.                                                                        |                                       |                                                                                       |                                                                                                            |                |      |
| Vegetated Roof Water-Balance Model: Experimental and Model Results                                                       | Experiments based on a weighing lysimeter approach were used to develop, calibrate, and validate a water balance model. | Water balance                         | Pilot-scale; 1.22 x 0.62m (10 cm); Slope of 0                                         | 65% lightweight expandable shale, 15% biosolids, 10% perlite or other lightweight additives, and 10% fines | NSE; MSE; RMSE | 2012 |
| Modelling of green roof hydrological performance for urban drainage applications                                         | GR can effectively reduce runoff volume by 18–28% for common events with return periods less than 1 year.               | Water balance; Lumped reservoir model | 3 x 3 m (4 cm); a slope of 10°; 2 of 20 m <sup>2</sup> (3 cm and 6 cm); slope of 4.3° |                                                                                                            | Peak error; VE | 2014 |
| A modelling study of the event-based retention performance of green roof under the hot-humid tropical climate in Kuching | The GR presented a mean retention rate of 72.5%. It reduced to 12.0% under large events that could cause flash flood.   | Water balance                         |                                                                                       |                                                                                                            |                | 2017 |
| Retention performances of green roofs worldwide at different time scales                                                 | The paper assessed the feasibility of GR implementation based on ERA-Interim database.                                  | Water balance                         |                                                                                       |                                                                                                            |                | 2018 |
| Water retention performance of green roof technology: A comparison of canadian climates                                  | The performance of GR in runoff reduction depended on local climate and vegetation types.                               | Water balance                         |                                                                                       |                                                                                                            |                | 2019 |

|                                                                                                                                                       |                                                                                                                    |                                    |                                                                 |                                                                                                                 |         |      |
|-------------------------------------------------------------------------------------------------------------------------------------------------------|--------------------------------------------------------------------------------------------------------------------|------------------------------------|-----------------------------------------------------------------|-----------------------------------------------------------------------------------------------------------------|---------|------|
| Theoretical Framework to Assess Green Roof Performance in Mitigating Urban Flooding as a Potential Nature-Based Solution                              | The impacts of vegetation types on GR runoff reduction was investigated based on a hypothetical GR.                | Water balance                      | Pilot-scale; 1 m <sup>2</sup> ; sedum                           |                                                                                                                 | NSE     | 2021 |
| Modelling the hydrological responses of green roofs under different substrate designs and rainfall characteristics using a simple water balance model | GR was more effective to capture small rainfall events.                                                            | Water balance                      | Pilot-scale; 1 m <sup>2</sup> (5cm/ 10cm); Slope of 2%, 7%, 12% |                                                                                                                 | NSE; VE | 2021 |
| Vegetated roofs for stormwater management at multiple spatial scales                                                                                  | Watershed-scale GR implementation can significantly reduce peak runoff, particularly for small storm events.       | CN                                 |                                                                 |                                                                                                                 |         | 2007 |
| Unsaturated 2D modelling of subsurface water flow in the coarse-grained porous matrix of a green roof                                                 | A GR model based on SWMS_2D was built and successfully replicated the outflow.                                     | SWMS_2D                            | Full-scale; 170 m <sup>2</sup> (20 cm); Flat roof               | Volcanic material (pumices 25%, lapillus 65%, zeolite 10%) and organic matter (peat and vegetable compost, 16%) |         | 2009 |
| Physically Based Green Roof Model                                                                                                                     | Soil water would drain through the growing medium when soil moisture varied between field capacity and saturation. | Green-Ampt equation; Water balance | Full-scale; 2,620 ft <sup>2</sup> slope of 2.1%                 | 20% digested fiber, 10% compost, 22% coarse perlite, and 28% sandy loam; The field                              |         | 2010 |

|                                                                                         |                                                                                                                                 |                     |                                                   |                                                                                                                 |    |      |
|-----------------------------------------------------------------------------------------|---------------------------------------------------------------------------------------------------------------------------------|---------------------|---------------------------------------------------|-----------------------------------------------------------------------------------------------------------------|----|------|
|                                                                                         |                                                                                                                                 |                     |                                                   | capacity and porosity (calibration): 0.35 and 0.41,                                                             |    |      |
| Storm water infiltration in a monitored green roof for hydrologic restoration           | A GR model based on SWMS_2D successfully simulated GR outflow.                                                                  | SWMS_2D             | Full-scale; 170 m <sup>2</sup> (20 cm); Flat roof | Volcanic material (pumices 25%, lapillus 65%, zeolite 10%) and organic matter (peat and vegetable compost, 16%) |    | 2011 |
| Experimental analysis of green roof substrate detention characteristics                 | GR detention increases with increasing substrate depth and organic content.                                                     | Reservoir model     | Pilot-scale; Diameter of 36 cm (15 cm)            |                                                                                                                 |    | 2013 |
| A two-stage storage routing model for green roof runoff detention                       | Non-linear reservoir model can be used to predict GR flow.                                                                      | Reservoir model     | Pilot-scale; 1m x 5m (20 cm); slope of 2%         | 55% crushed brick, 30% pumice, 10% coir, 5% compost                                                             |    | 2014 |
| Analytical Probabilistic Model for Evaluating the Hydrologic Performance of Green Roofs | An analytical probabilistic model was developed based on local rainfall characteristics using Poisson distributions.            | Probabilistic model |                                                   |                                                                                                                 |    | 2013 |
| Stochastic Analysis of Hydrologic Operation of Green Roofs                              | Based on water balance, analytical solutions were derived for a probabilistic GR model for supporting GR design and operations. | Probabilistic model |                                                   |                                                                                                                 |    | 2016 |
| Toward an operational tool to simulate green                                            | GR can significantly reduce runoff volume and peak flow and the model performance                                               | Multi-Hydro         | Pilot-scale; 35 m <sup>2</sup>                    | Lapillus, peat and green                                                                                        | VE | 2016 |

|                                                                                                                                |                                                                                                                                                                                                                        |                                                |                                                                     |                                                        |      |      |
|--------------------------------------------------------------------------------------------------------------------------------|------------------------------------------------------------------------------------------------------------------------------------------------------------------------------------------------------------------------|------------------------------------------------|---------------------------------------------------------------------|--------------------------------------------------------|------|------|
| roof hydrological impact at the basin scale: a new version of the distributed rainfall–runoff model Multi-Hydro                | was impacted by the rainfall intensities and soil initial saturation.                                                                                                                                                  |                                                | (3 cm)                                                              | compost                                                |      |      |
| Laboratory Tests of Substrate Physical Properties May Not Represent the Retention Capacity of Green Roof Substrates In Situ    | Laboratory-based measures (water holding capacity) significantly overestimated the real rainfall retention in GR.                                                                                                      | Mass balance                                   | Pilot-scale; 116 cm × 116 cm (10 cm); Slope of 2°                   | 80% mineral component and 20% horticultural grade coir |      | 2017 |
| Drainage flux simulation of green roofs under wet conditions                                                                   | CN method may reproduce the drainage of GR under extreme wetness conditions.                                                                                                                                           | CN                                             | Pilot-scale; 0.77×0.57m (12.0 cm)                                   | volcanic medium; blonde peat and a recycled medium     | NSE  | 2018 |
| Using a Hydrological Model to Simulate the Performance and Estimate the Runoff Coefficient of Green Roofs in Semiarid Climates | IHMORS was able to predict the soil moisture dynamics for tested specimens of 10 cm depth.                                                                                                                             | Integrated Hydrological Model                  | Pilot-scale; 25/35 m <sup>2</sup> (5/10/20 cm); Slope of 1°, 2°, 5° | 68% sand, 20% silt, 12% clay                           | MAE  | 2018 |
| Mechanisms controlling green roof peak flow rate attenuation                                                                   | When the GR substrate moisture content reached field capacity, peak flow attenuation significantly decreased.                                                                                                          | Richard's equation                             | 4 m × 3 m (10 cm)                                                   |                                                        | RMSE | 2019 |
| Analysis of potential benefits on flood mitigation of a CAM green roof in Mediterranean urban areas                            | A GR model was built to simulate the runoff reduction considering two types of vegetation – C3 and CAM. The model showed C3 presented a higher runoff retention capacity than CAM vegetation with frequent irrigation. | Ecohydrological Streamflow Mode; Water balance | Full-scale; 16 m × 3 m (30 cm)                                      | Sandy soil                                             | NSE  | 2020 |

|                                                                                                                                           |                                                                                                                                                                |                                             |                                             |                                                          |                                                |      |
|-------------------------------------------------------------------------------------------------------------------------------------------|----------------------------------------------------------------------------------------------------------------------------------------------------------------|---------------------------------------------|---------------------------------------------|----------------------------------------------------------|------------------------------------------------|------|
| Assessing the runoff retention of extensive green roofs using runoff coefficients and curve numbers and the impacts of substrate moisture | Experimental rainfall-runoff data were used to derive CN for four designs of GR. A positive relationship was found between initial moisture and CN.            | CN                                          | Pilot-scale;<br>100 cm × 100 cm<br>(5/10cm) | rural soil, peat soil, pine needle, perlite, vermiculite |                                                | 2020 |
| The importance of unsaturated hydraulic conductivity measurements for green roof detention modelling                                      | Soil column experiments were conducted to derive hydraulic conductivity function (HCF). A simplified HCF was proposed and provided reasonable HCF estimations. | Richard's equation                          |                                             |                                                          | RMSE;<br>NSE                                   | 2020 |
| On the impact of porous media microstructure on rainfall infiltration of thin homogeneous green roof growth substrates                    | Larger particle sizes in relation to the substrate thickness may reduce infiltration.                                                                          | Lattice Boltzmann method                    |                                             |                                                          |                                                | 2020 |
| Evaluating different machine learning methods to simulate runoff from extensive green roofs                                               | Well-trained ML models can estimate GR runoff.                                                                                                                 | Machine learning model;<br>Conceptual model | 16 pilot-roofs                              |                                                          | RMSE;<br>VE                                    | 2021 |
| Unprecedented Retention Capabilities of Extensive Green Roofs—New Design Approaches and an Open-Source Model                              | Increasing flow length and decreasing slope can reduce GR runoff.                                                                                              | Richards' equation                          | Pilot-scale;<br>20 m x 1 m<br>(8 / 10 cm)   |                                                          | RMSE                                           | 2021 |
| Effects of initial abstraction ratios in SCS-CN method on runoff prediction of green roofs in a semi-arid region                          | The initial abstraction ratios in CN method influenced rainfall-runoff simulations.                                                                            | CN                                          | Pilot-scale;<br>1 m <sup>2</sup>            |                                                          | RMSE;<br>MSE;<br>NSE;<br>Willmott's index (WI) | 2021 |

|                                                                                                                  |                                                                                                                                                 |                             |                                                       |                                                               |                |      |
|------------------------------------------------------------------------------------------------------------------|-------------------------------------------------------------------------------------------------------------------------------------------------|-----------------------------|-------------------------------------------------------|---------------------------------------------------------------|----------------|------|
| Hydrological Performance of Green Roof Systems: A Numerical Investigation                                        | The SEEP/W model predicted faster and greater peak time and peak discharge values.                                                              | SEEP/W Model                | Pilot-scale;<br>2m × 2m<br>(25 cm);<br>Slope of 5°    |                                                               |                | 2021 |
| Green roof performance potential in cold and wet regions                                                         | GR annual retention was found to be more sensitive to the changes in crop coefficients than in storage capacities.                              | ET models;<br>Water balance |                                                       |                                                               |                | 2017 |
| Retention performance of green roofs in representative climates worldwide                                        | Substrate depth played a crucial role in determining GR retention performance. GR can reduce runoff into sewer systems at an annual time scale. | Water balance               |                                                       |                                                               |                | 2017 |
| Towards a generic rainfall-runoff model for green roofs                                                          | Thornthwaite ET formula can be used for monthly ET estimation.                                                                                  | Conceptual model            | Pilot-scale;<br>3m x 1m<br>(8 cm);<br>a slope of 1.58 |                                                               | R <sup>2</sup> | 2010 |
| Nine-month evaluation of runoff quality and quantity from an experiential green roof in Missouri, USA            | Plant species and substrate characteristics influenced the hydrological performance of GR.                                                      | Water balance               | Pilot-scale;<br>60.8 cm x 60.8 cm                     |                                                               |                | 2015 |
| Parameters influencing the regeneration of a green roof's retention capacity via evapotranspiration              | Differences in ET were found between vegetated and non-vegetated configurations.                                                                | Water balance               | Pilot-scale;<br>23.7 x 23.7<br>(8 cm)                 |                                                               |                | 2015 |
| A Comprehensive Analysis of the Variably Saturated Hydraulic Behavior of a Green Roof in a Mediterranean Climate | Hydrus-3D model provided high accuracy to replicate runoff.                                                                                     | Hydrus-3D                   | Full-scale;<br>50 m <sup>2</sup><br>(8 cm)            | Mineral soil with 74% gravel, 22% sand, and 4% silt and clay. | NSE            | 2016 |

|                                                                                                                                                                         |                                                                                                                                                                                                  |                  |                                                |                                                                                          |                                        |      |
|-------------------------------------------------------------------------------------------------------------------------------------------------------------------------|--------------------------------------------------------------------------------------------------------------------------------------------------------------------------------------------------|------------------|------------------------------------------------|------------------------------------------------------------------------------------------|----------------------------------------|------|
| A modelling study of long term green roof retention performance                                                                                                         | Lower soil water holding capacity and ET reduced GR water retention.                                                                                                                             | Conceptual model |                                                |                                                                                          |                                        | 2013 |
| Scale dynamics of extensive green roofs: Quantifying the effect of drainage area and rainfall characteristics on observed and modeled green roof hydrologic performance | Peak reduction increased with increasing drainage area. Hydrus 1-D partially captured the GR hydrological behavior.                                                                              | Hydrus-1D        | Full-scale; 3.2 cm                             |                                                                                          | NSE                                    | 2014 |
| Green roof aging: Quantifying the impact of substrate evolution on hydraulic performances at the lab-scale                                                              | Hydraulic parameters were obtained based on inverse solution using hydrus-1D software. The substrate saturated water content decreased and saturated hydraulic conductivity increased over time. | Hydrus-1D        | Pilot-scale; 14 mm                             | 80% pozzolana and 20% organic matter                                                     | NSE; normal Root Mean Square Deviation | 2018 |
| The influence of substrate and vegetation configuration on green roof hydrological performance                                                                          | Vegetated beds presented higher capacity of water retention compared with unvegetated beds.                                                                                                      | Conceptual mode  | Pilot-scale; 3 m × 1 m (8 cm); a slope of 1.5° |                                                                                          |                                        | 2015 |
| Runoff reduction from extensive green roofs having different substrate depth and plant cover                                                                            | Curve number was influenced by both substrate depth and plant type.                                                                                                                              | CN               | Pilot-scale; 110 cm x 210 cm (8cm/16cm)        | Pumice, attapulgite clay, zeolite and grape marc compost with proportions of 65:15:5:15. | RMSE; determination coefficient        | 2017 |
| Stormwater management of biochar-amended green roofs: peak flow and hydraulic parameters                                                                                | Biochar can improve saturated water content but decrease the saturated hydraulic properties.                                                                                                     | Hydrus-1D        | Pilot-scale; 30 cm in diameter (15cm)          | Four substrate types were included.                                                      |                                        | 2020 |

|                                                                                                                                    |                                                                                                                                            |           |                                      |                                                                                                                         |      |      |
|------------------------------------------------------------------------------------------------------------------------------------|--------------------------------------------------------------------------------------------------------------------------------------------|-----------|--------------------------------------|-------------------------------------------------------------------------------------------------------------------------|------|------|
| using combined experimental and numerical investigation                                                                            |                                                                                                                                            |           |                                      |                                                                                                                         |      |      |
| An experimental and numerical investigation of the mechanism of improving the rainwater retention of green roofs with layered soil | Multi-layered soils can improve GR hydrological performance—an upper layer of higher permeability and a lower layer of lower permeability. | Hydrus-1D | Pilot-scale; 300 mm × 300 mm (10 cm) | Substrate1: rural soil, peat, and river sand with a volume ratio of 1:1:1, substrate S2 with rural soil and peat of 4:1 | RMSE | 2022 |
